# Supplementary material for: Effects of N-oxidation on the molecular and crystal structures and properties of isocinchomeronic acid, its metal complexes and their supramolecular architectures: experimental, CSD survey, solution and theoretical approaches
Source: Royal Society of Chemistry journal article supplement (doi:10.1039/c9ra05143k), 2019-01-01
Supplement: c9ra05143k1.pdf [file c9ra05143k1.pdf]

## Supporting Information for

### **Effects of *N*-oxidation on the molecular and crystal structures and properties of the isocinchomeric acid, its metal complexes and their supramolecular architectures: Experimental, CSD survey, solution and theoretical approaches**

Zahra Hosseini-Hashemi,<sup>a</sup> Masoud Mirzaei,<sup>\*,a</sup> Ameneh Jafari,<sup>a</sup> Peyman Hosseinpour,<sup>a</sup> Mohammad Yousefi,<sup>b</sup> Antonio Frontera,<sup>c</sup> Mahmoud Lari Dashtbayaz,<sup>d</sup> Mojtaba Shamsipur<sup>e</sup> and Mehdi Ardalani<sup>e</sup>

<sup>a</sup>*Department of Chemistry, Faculty of Science, Ferdowsi University of Mashhad, Mashhad, IRAN*

<sup>b</sup>*Department of Chemistry, Yadegar-e-Imam Khomeini (RAH) Shahr-e-Rey Branch, Islamic Azad University, Tehran, IRAN*

<sup>c</sup>*Department of chemistry, Universitat de les Illes Balears, Crta de Valldemossa km 7.5, 07122 Palma de Mallorca (Balears), SPAIN*

<sup>d</sup>*Assistant Professor of Accounting, Ferdowsi University of Mashhad, Mashhad, IRAN*

<sup>e</sup>*Department of Analytical Chemistry, Razi University, Kermanshah, IRAN*

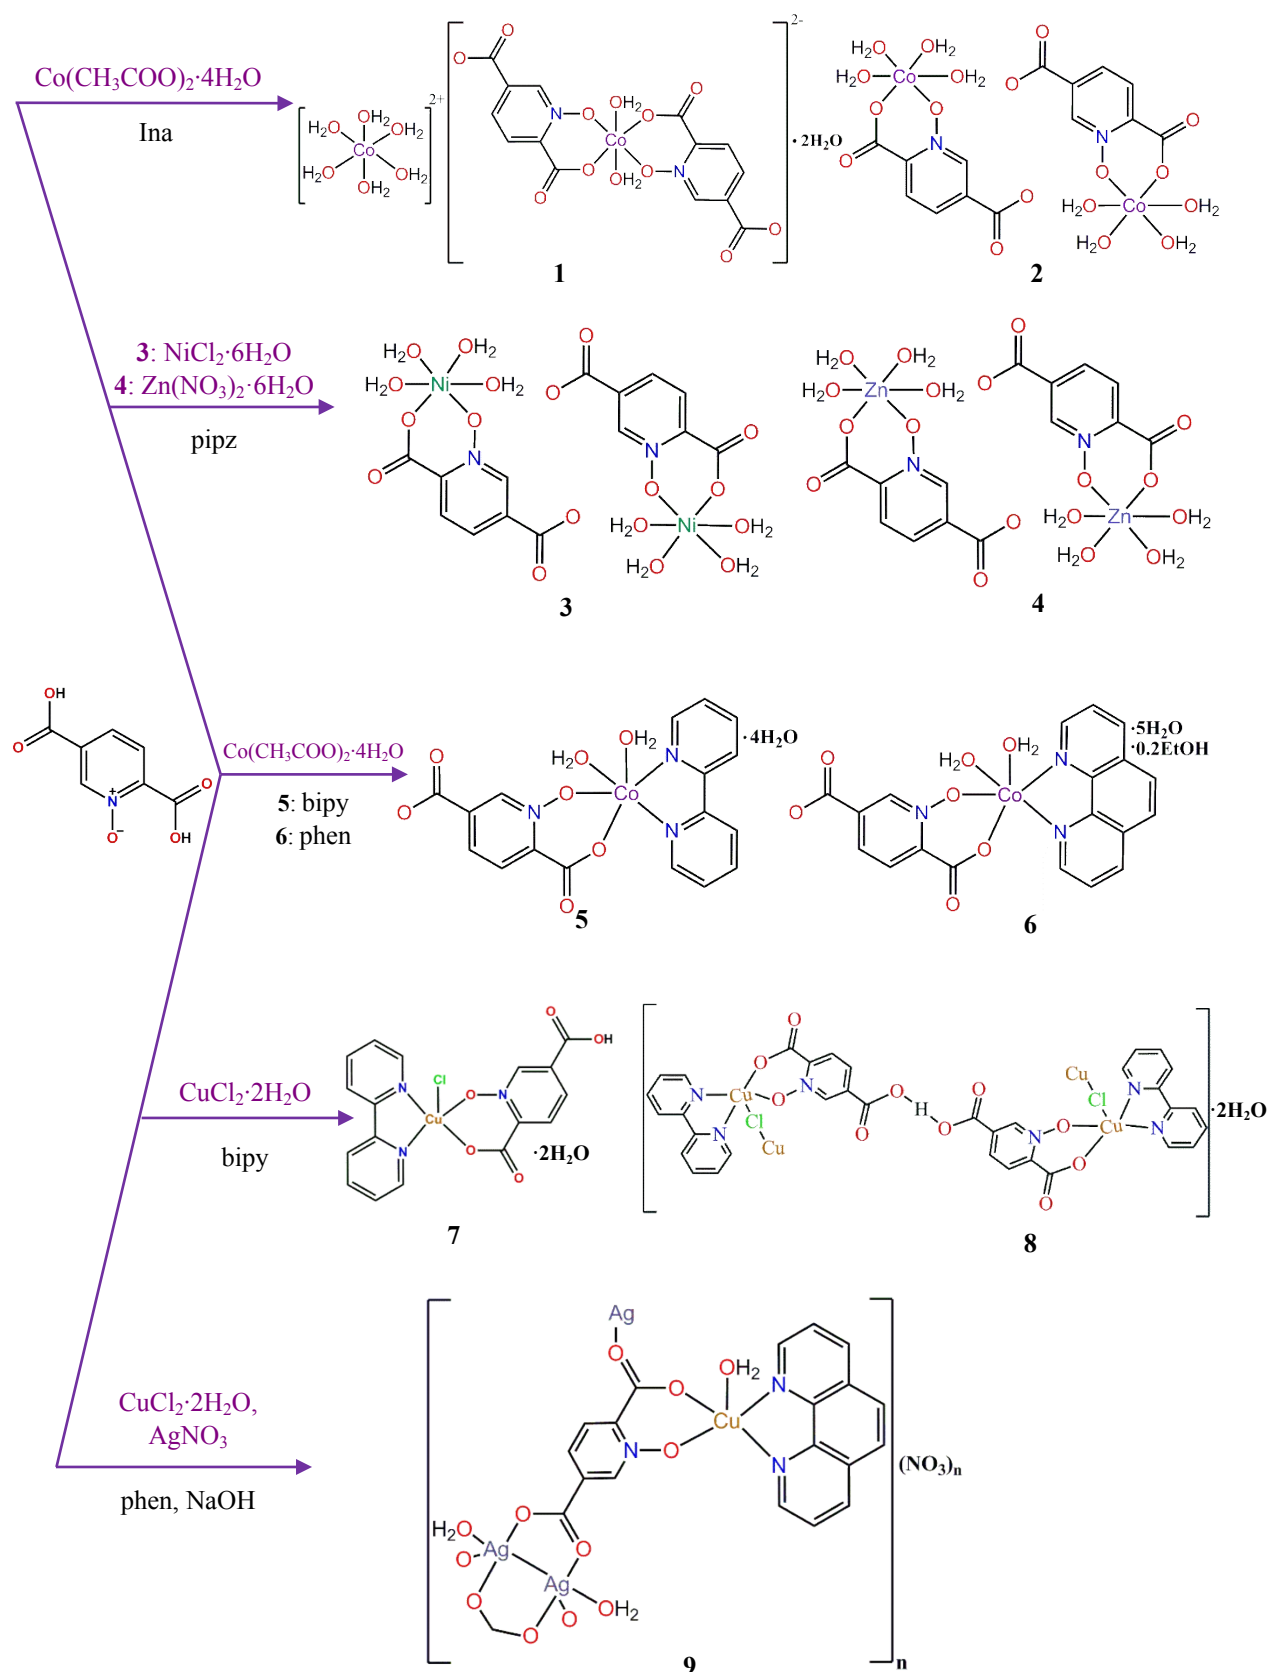

Scheme S1. Synthetic routes for compounds 1-9.

[for reporting relative intensities, the intensity of the base peak in (see Fig. S1 in the Supporting Information) (94%) was changed to 100% and the intensities of the other peaks were corrected by a factor of 100/94].

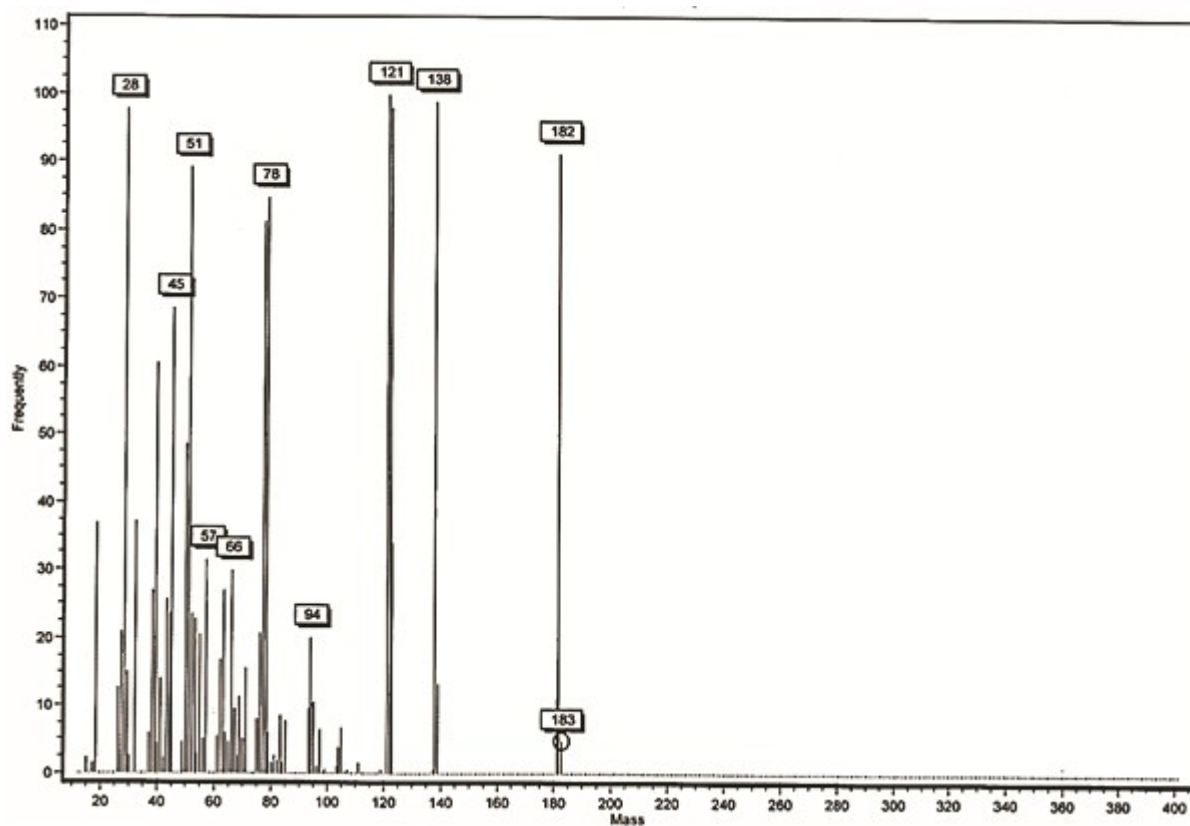

**Fig. S1.** Mass spectrum of H<sub>2</sub>pydco.

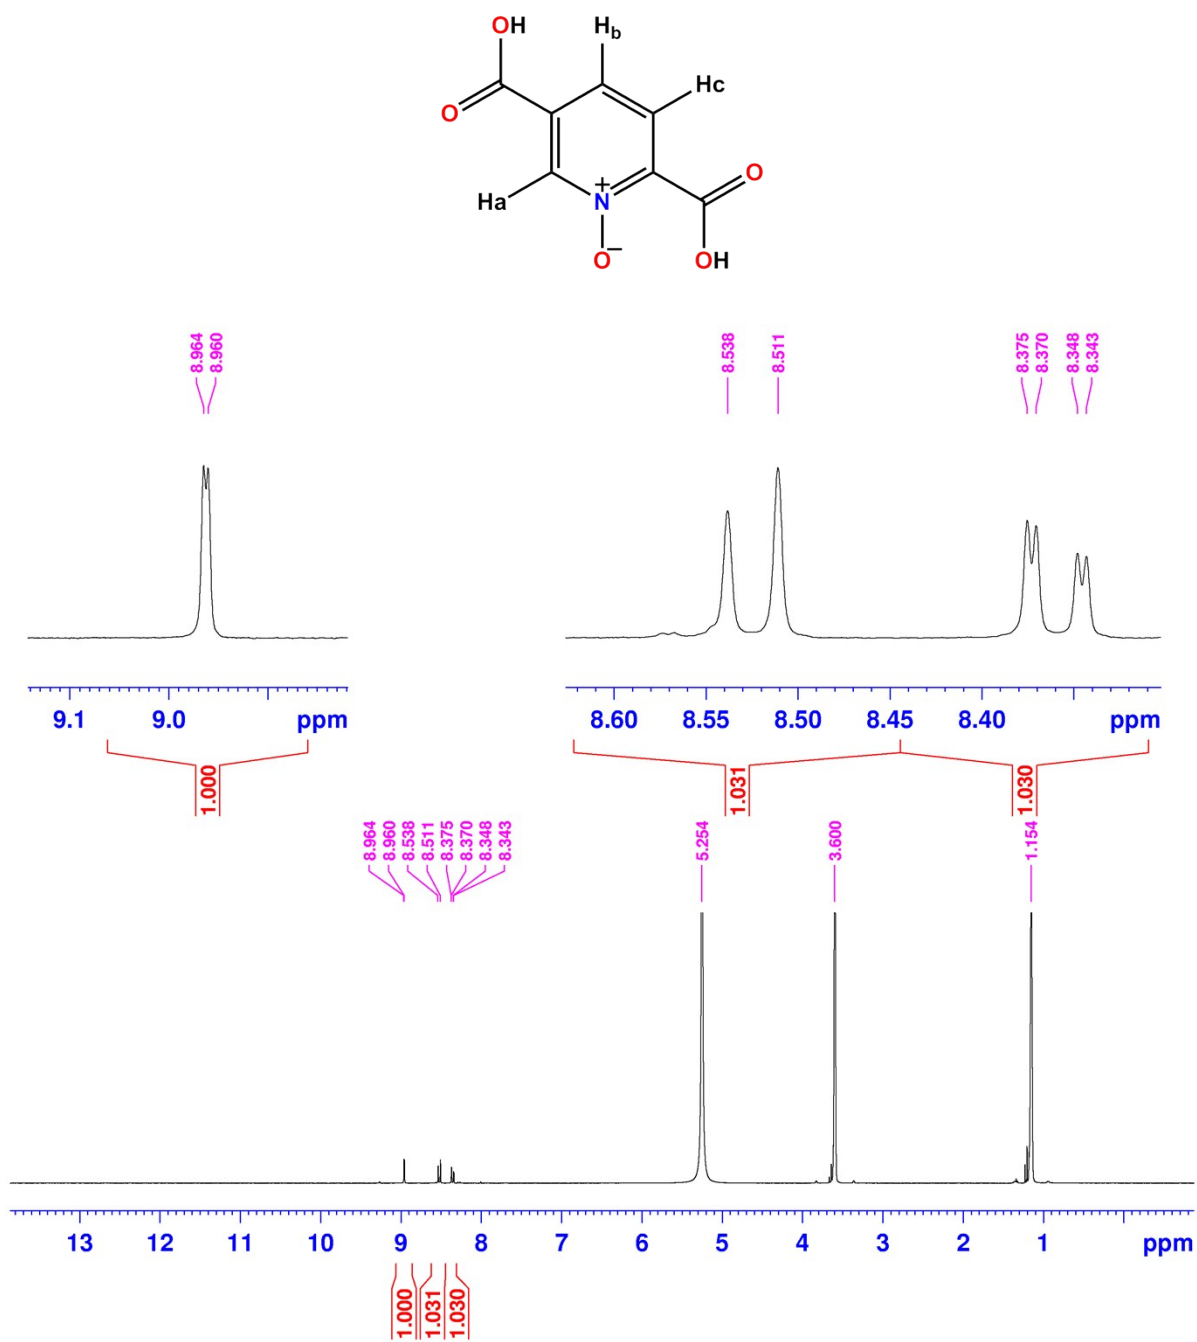

Fig. S2. <sup>1</sup>H NMR of H<sub>2</sub>pydco.

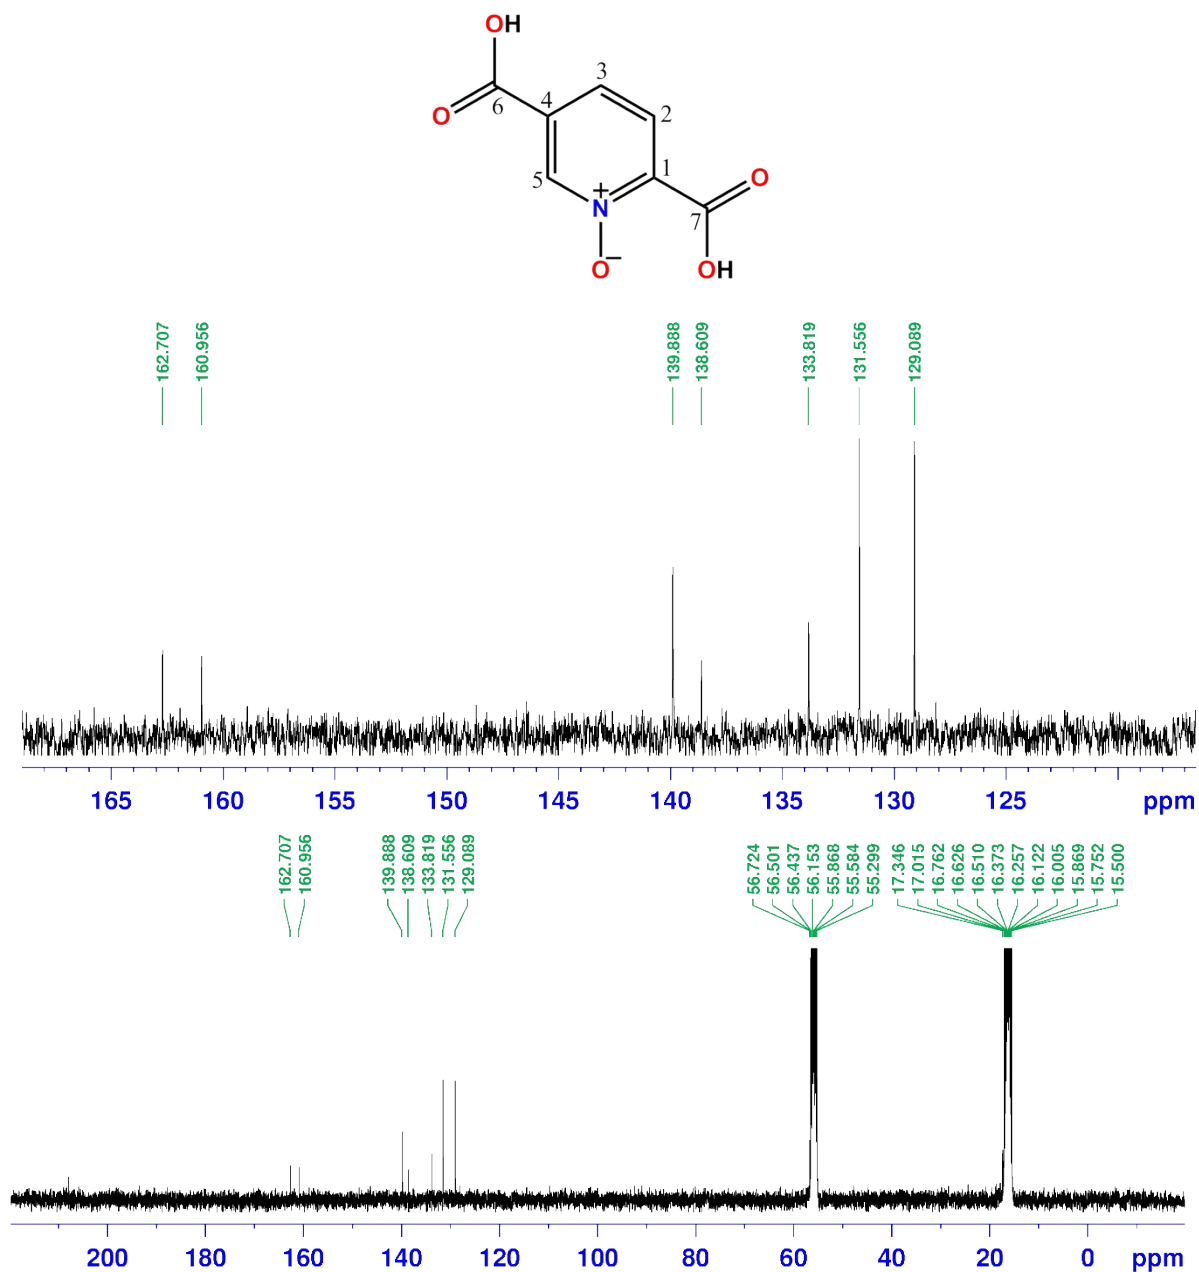

**Fig. S3.**  $^{13}\text{C}\{^1\text{H}\}$  NMR spectrum of  $\text{H}_2\text{pydco}$ .

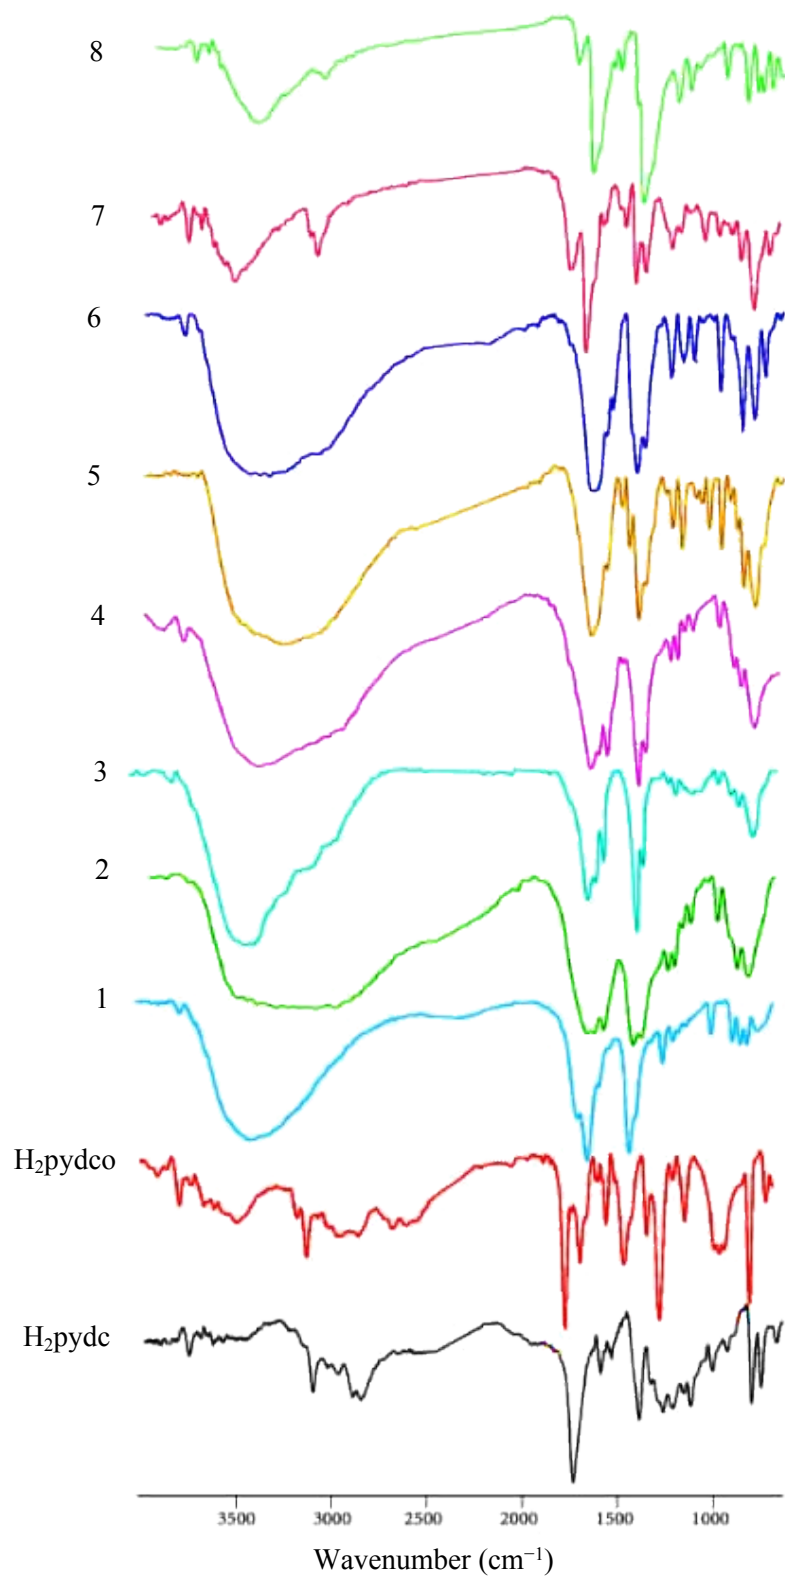

**Fig. S4.** Infrared spectra of H<sub>2</sub>pydc, H<sub>2</sub>pydco, and **1-9**.

**Table S1.** Selected bond lengths (Å) and valence angles (°) for **1–9**.

| <b>1</b>                                                            |            |               |             |
|---------------------------------------------------------------------|------------|---------------|-------------|
| Co1 O3i                                                             | 2.018 (3)  | O1 Co1 O6     | 89.4 (2)    |
| Co1 O3                                                              | 2.018 (3)  | O3i Co1 O6i   | 92.77 (16)  |
| Co1 O1i                                                             | 2.032 (4)  | O3 Co1 O6i    | 87.23 (16)  |
| Co1 O1                                                              | 2.032 (4)  | O1i Co1 O6i   | 89.4 (2)    |
| Co1 O6                                                              | 2.116 (6)  | O1 Co1 O6i    | 90.6 (2)    |
| Co1 O6i                                                             | 2.116 (6)  | O6 Co1 O6i    | 180         |
| Co2 O9                                                              | 2.081 (4)  | O9 Co2 O9ii   | 96.2 (3)    |
| Co2 O9ii                                                            | 2.081 (4)  | O9 Co2 O8ii   | 87.2 (2)    |
| Co2 O8ii                                                            | 2.086 (6)  | O9ii Co2 O8ii | 87.4 (2)    |
| Co2 O8                                                              | 2.086 (6)  | O9 Co2 O8     | 87.4 (2)    |
| Co2 O7ii                                                            | 2.097 (4)  | O9ii Co2 O8   | 87.2 (2)    |
| Co2 O7                                                              | 2.097 (4)  | O8ii Co2 O8   | 171.9 (2)   |
| O3i Co1 O3                                                          | 180        | O9 Co2 O7ii   | 175.47 (18) |
| O3i Co1 O1i                                                         | 86.17 (14) | O9ii Co2 O7ii | 88.32 (18)  |
| O3 Co1 O1i                                                          | 93.83 (14) | O8ii Co2 O7ii | 93.3 (2)    |
| O3i Co1 O1                                                          | 93.83 (14) | O8 Co2 O7ii   | 92.50 (19)  |
| O3 Co1 O1                                                           | 86.17 (14) | O9 Co2 O7     | 88.32 (18)  |
| O1i Co1 O1                                                          | 180        | O9ii Co2 O7   | 175.47 (18) |
| O3i Co1 O6                                                          | 87.23 (16) | O8ii Co2 O7   | 92.5 (2)    |
| O3 Co1 O6                                                           | 92.77 (16) | O8 Co2 O7     | 93.3 (2)    |
| O1i Co1 O6                                                          | 90.6 (2)   | O7ii Co2 O7   | 87.2 (2)    |
| Symmetry codes: (i) $-x+1/2, -y+1/2, -z$ ; (ii) $-x+1, y, -z+1/2$ . |            |               |             |
| <b>2</b>                                                            |            |               |             |
| Co1 O10                                                             | 2.0578(18) | Co2 O17       | 2.0714(18)  |
| Co1 O8                                                              | 2.0674(19) | Co2 O18       | 2.0738(17)  |
| Co1 O5                                                              | 2.0901(17) | Co2 O15       | 2.0756(17)  |
| Co1 O7                                                              | 2.0978(17) | Co2 O2        | 2.0873(17)  |
| Co1 O1                                                              | 2.0991(17) | Co2 O16       | 2.1039(19)  |
| Co1 O9                                                              | 2.1248(18) | Co2 O13       | 2.1041(17)  |
| O10 Co1 O8                                                          | 88.94(8)   | O17 Co2 O18   | 179.41(8)   |
| O10 Co1 O5                                                          | 89.76(7)   | O17 Co2 O15   | 93.74(7)    |
| O8 Co1 O5                                                           | 93.45(8)   | O18 Co2 O15   | 85.69(7)    |
| O10 Co1 O7                                                          | 176.68(7)  | O17 Co2 O2    | 85.74(7)    |
| O8 Co1 O7                                                           | 87.78(8)   | O18 Co2 O2    | 94.10(8)    |
| O5 Co1 O7                                                           | 90.01(7)   | O15 Co2 O2    | 91.77(7)    |
| O10 Co1 O1                                                          | 94.50(8)   | O17 Co2 O16   | 86.27(8)    |
| O8 Co1 O1                                                           | 175.41(7)  | O18 Co2 O16   | 93.93(8)    |

|            |           |             |           |
|------------|-----------|-------------|-----------|
| O5 Co1 O1  | 83.53(7)  | O15 Co2 O16 | 92.55(8)  |
| O7 Co1 O1  | 88.76(7)  | O2 Co2 O16  | 171.15(6) |
| O10 Co1 O9 | 87.04(7)  | O17 Co2 O13 | 90.30(7)  |
| O8 Co1 O9  | 92.22(8)  | O18 Co2 O13 | 90.25(7)  |
| O5 Co1 O9  | 173.43(7) | O15 Co2 O13 | 174.82(7) |
| O7 Co1 O9  | 93.52(7)  | O2 Co2 O13  | 85.31(7)  |
| O1 Co1 O9  | 91.00(7)  | O16 Co2 O13 | 90.94(8)  |

---

### 3

|           |            |             |            |
|-----------|------------|-------------|------------|
| Ni1 O6    | 2.0156(15) | Ni2 O16     | 2.0410(14) |
| Ni1 O7    | 2.0472(15) | Ni2 O18     | 2.0424(15) |
| Ni1 O9    | 2.0503(15) | Ni2 O10     | 2.0429(15) |
| Ni1 O4    | 2.0507(14) | Ni2 O15     | 2.0462(15) |
| Ni1 O1    | 2.0679(14) | Ni2 O13     | 2.0632(15) |
| Ni1 O8    | 2.1030(14) | Ni2 O17     | 2.0676(15) |
| O6 Ni1 O7 | 88.30(7)   | O16 Ni2 O18 | 86.40(6)   |
| O6 Ni1 O9 | 176.37(5)  | O16 Ni2 O10 | 90.81(6)   |
| O7 Ni1 O9 | 88.10(7)   | O18 Ni2 O10 | 94.53(6)   |
| O6 Ni1 O4 | 90.46(6)   | O16 Ni2 O15 | 92.67(6)   |
| O7 Ni1 O4 | 93.38(7)   | O18 Ni2 O15 | 179.01(6)  |
| O9 Ni1 O4 | 89.31(6)   | O10 Ni2 O15 | 85.82(6)   |
| O6 Ni1 O1 | 95.04(6)   | O16 Ni2 O13 | 176.69(5)  |
| O7 Ni1 O1 | 176.32(5)  | O18 Ni2 O13 | 91.76(6)   |
| O9 Ni1 O1 | 88.55(6)   | O10 Ni2 O13 | 86.59(6)   |
| O4 Ni1 O1 | 85.04(6)   | O15 Ni2 O13 | 89.18(6)   |
| O6 Ni1 O8 | 86.81(6)   | O16 Ni2 O17 | 91.16(6)   |
| O7 Ni1 O8 | 90.59(7)   | O18 Ni2 O17 | 92.47(7)   |
| O9 Ni1 O8 | 93.67(6)   | O10 Ni2 O17 | 172.84(5)  |
| O4 Ni1 O8 | 175.11(5)  | O15 Ni2 O17 | 87.21(7)   |
| O1 Ni1 O8 | 91.16(6)   | O13 Ni2 O17 | 91.68(6)   |

---

### 4

|            |            |             |            |
|------------|------------|-------------|------------|
| Zn1 O8     | 2.057(3)   | Zn2 O18     | 2.037(3)   |
| Zn1 O7     | 2.065(3)   | Zn2 O16     | 2.062(3)   |
| Zn1 O10    | 2.067(3)   | Zn2 O15     | 2.072(3)   |
| Zn1 O9     | 2.084(3)   | Zn2 O13     | 2.111(3)   |
| Zn1 O1     | 2.105(3)   | Zn2 O17     | 2.129(3)   |
| Zn1 O5     | 2.141(3)   | Zn2 O2      | 2.145(3)   |
| O8 Zn1 O7  | 85.85(12)  | O18 Zn2 O16 | 89.39(13)  |
| O8 Zn1 O10 | 95.02(12)  | O18 Zn2 O15 | 177.41(11) |
| O7 Zn1 O10 | 178.75(13) | O16 Zn2 O15 | 88.24(12)  |
| O8 Zn1 O9  | 93.45(12)  | O18 Zn2 O13 | 89.04(12)  |



|            |            |             |            |
|------------|------------|-------------|------------|
| O7 Zn1 O9  | 94.31(12)  | O16 Zn2 O13 | 94.22(12)  |
| O10 Zn1 O9 | 86.55(12)  | O15 Zn2 O13 | 90.10(11)  |
| O8 Zn1 O1  | 92.25(11)  | O18 Zn2 O17 | 86.72(12)  |
| O7 Zn1 O1  | 94.18(12)  | O16 Zn2 O17 | 92.47(13)  |
| O10 Zn1 O1 | 84.89(11)  | O15 Zn2 O17 | 94.42(11)  |
| O9 Zn1 O1  | 170.10(11) | O13 Zn2 O17 | 172.04(11) |
| O8 Zn1 O5  | 173.72(12) | O18 Zn2 O2  | 94.42(12)  |
| O7 Zn1 O5  | 89.40(12)  | O16 Zn2 O2  | 174.93(11) |
| O10 Zn1 O5 | 89.67(12)  | O15 Zn2 O2  | 87.89(11)  |
| O9 Zn1 O5  | 90.99(11)  | O13 Zn O2   | 82.52(10)  |
| O1 Zn1 O5  | 84.00(10)  | O17 Zn2 O2  | 91.08(11)  |

---

### 5

|           |            |           |           |
|-----------|------------|-----------|-----------|
| Co1 O6    | 2.0782(16) | O1 Co1 O7 | 89.57(7)  |
| Co1 O4    | 2.0829(17) | O6 Co1 N3 | 173.36(7) |
| Co1 O1    | 2.1009(17) | O4 Co1 N3 | 92.25(7)  |
| Co1 O7    | 2.1019(17) | O1 Co1 N3 | 94.72(7)  |
| Co1 N3    | 2.1072(17) | O7 Co1 N3 | 90.55(7)  |
| Co1 N2    | 2.1153(18) | O6 Co1 N2 | 96.20(7)  |
| O6 Co1 O4 | 90.02(7)   | O4 Co1 N2 | 95.41(7)  |
| O6 Co1 O1 | 91.72(7)   | O1 Co1 N2 | 172.06(6) |
| O4 Co1 O1 | 84.01(7)   | O7 Co1 N2 | 91.27(7)  |
| O6 Co1 O7 | 87.87(7)   | N3 Co1 N2 | 77.38(7)  |
| O4 Co1 O7 | 173.18(6)  |           |           |

---

### 6

|        |          |           |           |
|--------|----------|-----------|-----------|
| Co1 O1 | 2.095(2) | O1 Co1 O4 | 83.95(7)  |
| Co1 O4 | 2.059(2) | O6 Co1 O1 | 92.47(6)  |
| Co1 O6 | 2.113(2) | O4 Co1 N2 | 91.33(7)  |
| Co1 O7 | 2.078(2) | O4 Co1 O7 | 173.25(7) |
| Co1 N2 | 2.133(2) | O1 Co1 N3 | 172.87(7) |
| Co1 N3 | 2.118(2) | O6 Co1 N2 | 172.93(7) |

---

### 7

|            |            |            |           |
|------------|------------|------------|-----------|
| Cu1 O4     | 1.922(3)   | O4 Cu1 O1  | 90.15(13) |
| Cu1 O1     | 1.957(3)   | O1 Cu1 N2  | 89.56(14) |
| Cu1 N2     | 1.955(3)   | O4 Cu1 N3  | 91.14(14) |
| Cu1 N3     | 2.012(4)   | N2 Cu1 N3  | 81.14(15) |
| Cu1 Cl1    | 2.4517(15) | O4 Cu1 Cl1 | 96.66(12) |
| O4 Cu1 N2  | 163.81(16) | O1 Cu1 Cl1 | 99.30(11) |
| O1 Cu1 N3  | 149.97(15) | N2 Cu1 Cl1 | 99.36(12) |
| N3 Cu1 Cl1 | 110.33(11) |            |           |

---

| <b>8</b>   |            |            |          |
|------------|------------|------------|----------|
| Cu1–O4     | 1.927(2)   | O4 Cu1 O1  | 89.07(8) |
| Cu1–O1     | 1.9414(17) | O4 Cu1 N3  | 91.47(9) |
| Cu1–N3     | 1.986(2)   | O1 Cu1 N2  | 94.76(8) |
| Cu1–N2     | 1.999(2)   | N3 Cu1 N2  | 81.22(9) |
| Cu1–Cl1    | 2.5553(7)  | O4 Cu1 Cl1 | 97.94(7) |
| O1 Cu1 N3  | 166.23(7)  | O1 Cu1 Cl1 | 95.26(6) |
| O4 Cu1 N2  | 164.24(8)  | N2 Cu1 Cl1 | 96.92(6) |
| N3 Cu1 Cl1 | 98.29(6)   |            |          |
| <b>9</b>   |            |            |          |
| Ag1–O4     | 2.289(5)   | Cu1–O1     | 1.932(3) |
| Ag1–O7     | 2.370(6)   | Cu1–O2     | 1.907(4) |
| Ag1–Ag1    | 2.886(1)   | Cu1–O6     | 2.236(4) |
| Ag1–O3     | 2.606(4)   | Cu1–N2     | 2.003(4) |
| Ag1–O5     | 2.233(4)   | Cu1–N3     | 1.996(4) |
| O4 Ag1 O7  | 85.8(2)    | O1 Cu1 O2  | 92.9(1)  |
| O4 Ag1 Ag1 | 77.0(1)    | O1 Cu1 O6  | 95.0(2)  |
| O4 Ag1 O3  | 91.8(1)    | O1 Cu1 N2  | 159.7(2) |
| O4 Ag1 O5  | 146.7(1)   | O1 Cu1 N3  | 89.5(2)  |
| O7 Ag1 Ag1 | 162.7(2)   | O2 Cu1 O6  | 97.4(2)  |
| O7 Ag1 O3  | 90.5(2)    | O2 Cu1 N2  | 90.2(2)  |
| O7 Ag1 O5  | 115.7(2)   | O2 Cu1 N3  | 166.0(2) |
| O3 Ag1 O5  | 112.0(1)   | O6 Cu1 N2  | 104.5(2) |
| Ag1 Ag1 O3 | 87.94(9)   | O6 Cu1 N3  | 96.1(2)  |
| Ag1 Ag1 O5 | 80.79(9)   | N2 Cu1 N3  | 82.9(2)  |

**Table S2.** Selected Hydrogen bond geometry, lengths (Å) and valence angles (°) for **1–9**.

| D–H···A         | D–H      | H···A    | D···A     | D–H···A  |
|-----------------|----------|----------|-----------|----------|
| <b>1</b>        |          |          |           |          |
| O10 H1···O4iii  | 0.89 (7) | 1.90 (7) | 2.769 (6) | 165 (6)  |
| O10 H2···O2iv   | 0.95 (9) | 1.79 (9) | 2.729 (5) | 173 (8)  |
| O6 H61···O10v   | 0.86 (7) | 1.91 (7) | 2.733 (6) | 158 (7)  |
| O6 H62···O5vi   | 0.78 (7) | 2.07 (7) | 2.837 (8) | 166 (8)  |
| O7 H71···O4i    | 0.81 (7) | 2.00 (7) | 2.759 (6) | 155 (6)  |
| O7 H72···O5vii  | 0.70 (7) | 2.10 (7) | 2.788 (5) | 166 (7)  |
| O8 H81···O1ii   | 0.91 (2) | 2.35 (8) | 3.012 (5) | 130 (9)  |
| O8 H81···O3viii | 0.91 (2) | 2.29 (6) | 3.103 (6) | 149 (10) |
| O8 H82···O10    | 0.91 (2) | 1.92 (5) | 2.755 (6) | 152 (9)  |
| O9 H91···O1ii   | 0.90 (7) | 2.62 (7) | 3.338 (7) | 137 (5)  |
| O9 H91···O2ii   | 0.90 (7) | 1.92 (7) | 2.796 (6) | 165 (6)  |
| O9 H92···O5ix   | 0.78 (7) | 2.02 (7) | 2.786 (6) | 169 (8)  |

Symmetry codes: (i)  $-x+1/2, -y+1/2, -z$ ; (ii)  $-x+1, y, -z+1/2$ ; (iii)  $-x, -y, -z$ ; (iv)  $-x+1/2, y+1/2, -z+1/2$ ; (v)  $x, -y, z-1/2$ ; (vi)  $x+1/2, y+1/2, z$ ; (vii)  $x+1, -y, z+1/2$ ; (viii)  $x+1/2, -y+1/2, z+1/2$ ; (ix)  $-x+1/2, -y-1/2, -z$ .

## 2

|                |         |         |          |        |
|----------------|---------|---------|----------|--------|
| O7-H7A...O1    | 0.77(2) | 2.12(3) | 2.817(2) | 150(2) |
| O7-H7B...O13   | 0.84(3) | 1.89(3) | 2.717(3) | 172(3) |
| O8-H8A...O4    | 0.73(3) | 2.13(3) | 2.855(3) | 178(4) |
| O8-H8B...O14   | 0.81(3) | 2.01(3) | 2.812(3) | 169(3) |
| O9-H9A...O11   | 0.75(3) | 1.94(3) | 2.682(3) | 173(3) |
| O9-H9B...O11   | 0.78(2) | 2.12(2) | 2.871(3) | 162(3) |
| O10-H10A...O12 | 0.87(3) | 1.79(3) | 2.651(3) | 171(3) |
| O10-H10B...O12 | 0.72(3) | 2.10(3) | 2.812(3) | 168(3) |
| O15-H15A...O9  | 0.82    | 2.23    | 3.053(3) | 177    |
| O15-H15B...O4  | 0.88(3) | 1.88(2) | 2.765(3) | 176(3) |
| O16-H16A...O6  | 0.78(3) | 2.20(3) | 2.957(3) | 165(3) |
| O16-H16B...O1  | 0.74(3) | 2.20(3) | 2.933(3) | 174(3) |
| O17-H17A...O5  | 0.78(3) | 2.00(3) | 2.762(3) | 166(3) |
| O17-H17A...O6  | 0.78(3) | 2.60(3) | 3.221(3) | 138(3) |
| O17-H17B...O2  | 0.79(3) | 2.01(3) | 2.754(3) | 157(3) |
| O17-H17B...N2  | 0.79(3) | 2.49(3) | 3.005(3) | 124(3) |
| O18-H18A...O3  | 0.77(3) | 1.95(3) | 2.685(3) | 161(3) |
| O18-H18B...O3  | 0.86(3) | 1.83(3) | 2.686(3) | 170(3) |
| C1-H1...O18    | 0.93    | 2.49    | 3.379(3) | 159    |
| C4-H4...O15    | 0.93    | 2.49    | 3.367(3) | 157    |
| C5-H5...O6     | 0.93    | 2.45    | 3.345(3) | 162    |
| C11-H11...O7   | 0.93    | 2.50    | 3.260(3) | 139    |
| C12-H12...O14  | 0.93    | 2.56    | 3.310(3) | 139    |

## 3

|                |      |      |          |     |
|----------------|------|------|----------|-----|
| O6-H6A...O11   | 0.83 | 1.81 | 2.640(2) | 175 |
| O6-H6B...O11   | 0.79 | 2.02 | 2.798(2) | 169 |
| O7-H7A...O3    | 0.80 | 2.05 | 2.848(2) | 178 |
| O7-H7B...O14   | 0.82 | 2.01 | 2.821(2) | 169 |
| O8-H8A...O12   | 0.79 | 1.90 | 2.676(2) | 170 |
| O8-H8B...O12   | 0.77 | 2.14 | 2.890(2) | 164 |
| O9-H9A...O1    | 0.74 | 2.16 | 2.817(2) | 150 |
| O9-H9B...O13   | 0.83 | 1.90 | 2.720(2) | 171 |
| O15-H15A...O4  | 0.78 | 1.99 | 2.766(2) | 174 |
| O15-H15B...O10 | 0.82 | 2.01 | 2.770(2) | 154 |
| O15-H15B...N2  | 0.82 | 2.48 | 2.987(2) | 121 |
| O16-H16A...O8  | 0.83 | 2.24 | 3.031(2) | 162 |
| O16-H16B...O3  | 0.81 | 1.97 | 2.771(2) | 176 |
| O17-H17A...O5  | 0.76 | 2.19 | 2.941(2) | 166 |
| O17-H17B...O1  | 0.80 | 2.15 | 2.942(2) | 172 |
| O18-H18A...O2  | 0.88 | 1.81 | 2.683(2) | 174 |
| O18-H18B...O2  | 0.78 | 1.93 | 2.692(2) | 165 |
| C1-H1...O18    | 0.93 | 2.47 | 3.355(2) | 159 |
| C4-H4...O16    | 0.93 | 2.47 | 3.343(3) | 157 |
| C5-H5...O5     | 0.93 | 2.45 | 3.344(3) | 162 |
| C11-H11...O9   | 0.93 | 2.50 | 3.272(3) | 141 |
| C12-H12...O14  | 0.93 | 2.52 | 3.276(3) | 139 |

## 4

|                |         |         |          |        |
|----------------|---------|---------|----------|--------|
| O8-H8A...O17   | 0.80(4) | 2.29(4) | 3.048(5) | 159(4) |
| O8-H8B...O12   | 0.82(5) | 1.93(5) | 2.755(4) | 175(5) |
| O9-H9A...O14   | 0.83(4) | 2.09(4) | 2.908(5) | 172(3) |
| O9-H9B...O2    | 0.81(4) | 2.12(4) | 2.920(4) | 167(4) |
| O10-H10A...O13 | 0.93(5) | 1.82(5) | 2.753(4) | 174(5) |
| O10-H10A...O14 | 0.93(5) | 2.57(5) | 3.230(5) | 129(4) |
| O10-H10B...O1  | 0.86(6) | 2.54(5) | 2.817(4) | 100(4) |
| O10-H10B...O1  | 0.86(6) | 1.95(5) | 2.741(4) | 152(5) |

|                |         |         |          |        |
|----------------|---------|---------|----------|--------|
| O10-H10B...N1  | 0.86(6) | 2.46(5) | 2.986(5) | 120(4) |
| O15-H15A...O2  | 0.79(5) | 2.05(5) | 2.791(4) | 158(6) |
| O15-H15A...N2  | 0.79(5) | 2.54(5) | 3.163(4) | 137(5) |
| O15-H15B...O5  | 0.81(4) | 1.91(4) | 2.696(4) | 165(4) |
| O16-H16A...O6  | 0.81(5) | 2.00(5) | 2.791(5) | 164(5) |
| O16-H16B...O12 | 0.95(5) | 1.90(5) | 2.834(4) | 167(4) |
| O17-H17A...O3  | 0.87(5) | 1.82(5) | 2.678(5) | 167(5) |
| O17-H17B...O3  | 0.80(4) | 2.07(4) | 2.857(5) | 167(5) |
| O18-H18A...O4  | 0.77(5) | 1.88(5) | 2.649(5) | 176(6) |
| O18-H18B...O4  | 0.82(4) | 1.99(5) | 2.791(5) | 168(4) |
| C4-H4...O15    | 0.93    | 2.51    | 3.271(5) | 139    |
| C5-H5...O6     | 0.93    | 2.57    | 3.329(6) | 139    |
| C8-H8...O7     | 0.93    | 2.47    | 3.359(5) | 159    |
| C11-H11...O8   | 0.93    | 2.48    | 3.362(5) | 158    |
| C12-H12...O14  | 0.93    | 2.47    | 3.366(6) | 161    |

## 5

|                |         |         |          |        |
|----------------|---------|---------|----------|--------|
| O6-H6A...O2    | 0.84(4) | 1.81(4) | 2.653(2) | 176(3) |
| O6-H6A...O11   | 0.81(4) | 1.93(4) | 2.736(3) | 173(3) |
| O7-H7A...O3    | 0.77(4) | 1.94(4) | 2.717(3) | 175(3) |
| O7-H7B...O9    | 0.83(2) | 1.93(2) | 2.752(3) | 171(2) |
| O8-H8A...O2    | 0.91(3) | 1.99(3) | 2.877(4) | 163(3) |
| O8-H8B...O5    | 0.93(2) | 2.04(2) | 2.932(4) | 161(3) |
| O9-H9A...O3    | 0.83(3) | 1.94(3) | 2.768(3) | 173(3) |
| O9-H9B...O11   | 0.84(3) | 2.08(3) | 2.916(4) | 169(3) |
| O10-H10A...O1  | 0.85(2) | 2.18(2) | 2.970(3) | 155(3) |
| O10-H10B...O5  | 0.87(2) | 1.95(2) | 2.814(3) | 168(3) |
| O11-H11A...O8  | 0.86(2) | 2.13(2) | 2.944(4) | 159(3) |
| O11-H11B...O10 | 0.86(3) | 2.00(3) | 2.821(4) | 160(3) |
| C1-H1...O2     | 0.93    | 2.41    | 2.731(3) | 100    |
| C11-H11...O4   | 0.93    | 2.44    | 3.168(3) | 135    |

## 6

|                |         |         |          |        |
|----------------|---------|---------|----------|--------|
| O7-H7A...O3    | 0.84(5) | 1.86(5) | 2.700(2) | 175(4) |
| O7-H7B...O5    | 0.84(5) | 1.88(5) | 2.708(3) | 169(4) |
| O8-H8A...O13   | 0.87    | 2.40    | 2.765(7) | 105    |
| O8-H8B...O11   | 0.87    | 1.90    | 2.740(6) | 161    |
| O10-H10A...O2  | 0.97(4) | 1.80(4) | 2.767(3) | 173(5) |
| O10-H10B...O10 | 0.95(3) | 2.40(4) | 2.749(4) | 101(2) |
| O11-H11A...O3  | 0.91(3) | 1.87(3) | 2.776(3) | 175(3) |
| O11-H11B...O10 | 0.90(3) | 1.93(3) | 2.810(4) | 169(3) |
| O12-H12A...O1  | 0.95(3) | 1.80(3) | 2.751(3) | 178(3) |
| O12-H12A...N1  | 0.95(3) | 2.46(3) | 3.294(3) | 147(3) |
| O12-H12B...O11 | 0.93(3) | 1.88(3) | 2.796(3) | 168(3) |
| O13-H13A...O12 | 0.96(6) | 1.84(7) | 2.734(5) | 154(3) |
| O13-H13B...O5  | 0.94(6) | 2.43(7) | 2.966(5) | 116(5) |
| C5-H5...O13A   | 0.95    | 2.59    | 3.332(6) | 135    |
| C10-H10...O7   | 0.95    | 2.59    | 3.394(3) | 142    |
| C17-H17...O4   | 0.95    | 2.51    | 3.250(3) | 135    |
| C18-H18...O12  | 0.95    | 2.53    | 3.252(3) | 133    |

## 7

|               |         |         |          |        |
|---------------|---------|---------|----------|--------|
| O2-H2...O6    | 0.86(6) | 1.67(6) | 2.526(5) | 175(7) |
| O6-H6A...O3   | 0.87(3) | 2.05(4) | 2.838(7) | 149(5) |
| O6-H6B...O7   | 0.88(5) | 1.84(4) | 2.709(7) | 168(5) |
| O7-H7A...C11  | 0.76(6) | 2.63(7) | 3.176(5) | 131(5) |
| O7-H7B...O5   | 0.88(6) | 1.92(6) | 2.794(6) | 169(6) |
| C1-H1...O7    | 0.9300  | 2.48    | 3.345(7) | 156    |
| C10-H10...O5  | 0.9300  | 2.45    | 3.265(6) | 146    |
| C14-H14...O3  | 0.9300  | 2.53    | 3.371(6) | 151    |
| C15-H15...C11 | 0.9300  | 2.79    | 3.560(6) | 141    |

## 8

|             |         |         |           |        |
|-------------|---------|---------|-----------|--------|
| O2–H2…O2    | 1.2300  | 1.2300  | 2.463(3)  | 180    |
| O6–H6A…O5   | 0.90(4) | 1.98(4) | 2.864(4)  | 170(4) |
| O6–H6B…O6   | 0.91(3) | 2.59(3) | 3.440(5)  | 156(4) |
| C1–H1…O6    | 0.9300  | 2.55    | 3.373(5)  | 147    |
| C5–H5…O6    | 0.9300  | 2.30    | 3.109(5)  | 145    |
| C11–H11…O3  | 0.9300  | 2.38    | 3.295(4)  | 170    |
| C14–H14…O3  | 0.9300  | 2.39    | 3.282(4)  | 160    |
| <b>9</b>    |         |         |           |        |
| O6–H6A…O8   | 0.76(7) | 2.57(7) | 3.256(13) | 151(7) |
| O6–H6A…O9   | 0.76(7) | 2.54(8) | 3.26(2)   | 160(7) |
| O6–H6B…O5   | 0.78(7) | 2.03(7) | 2.803(6)  | 172(5) |
| O7–H7A…O8   | 0.88(6) | 2.30(6) | 3.108(13) | 153(5) |
| O7–H7B…O10  | 0.86(6) | 2.28(8) | 2.96(3)   | 136(6) |
| C4–H4…O9    | 0.9300  | 2.54    | 3.176(15) | 126    |
| C13–H13…O8  | 0.9300  | 2.36    | 3.255(14) | 162    |
| C19–H19…O10 | 0.9300  | 2.39    | 3.09(3)   | 132    |

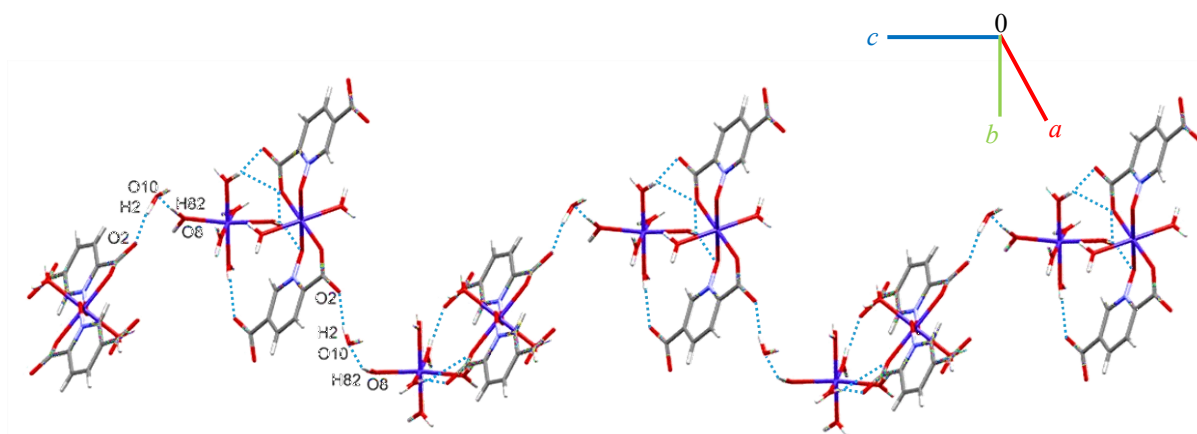

**Fig. S5.** Representation of the zigzag chain along the *c* axis in **1**.

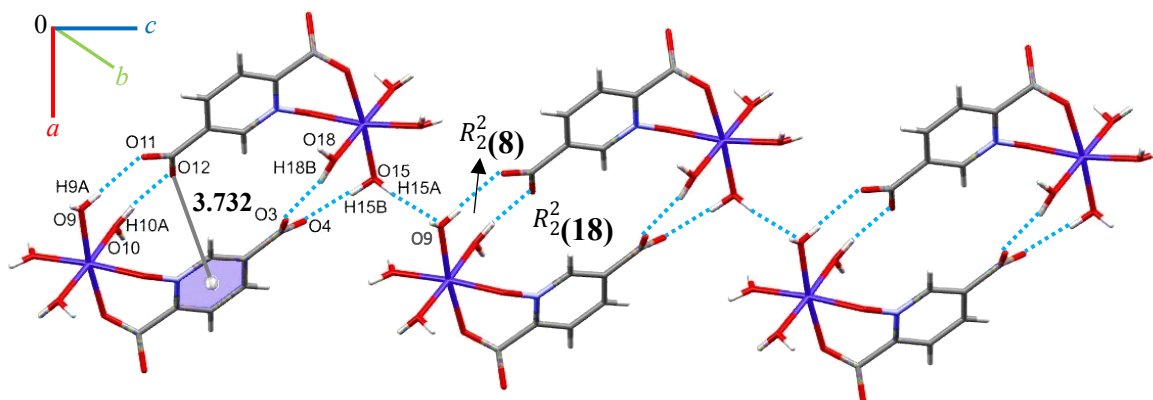

**Fig. S6.** Extended one-dimensional structure determined along the *c* by hydrogen bonding, C–O… $\pi$  interactions and cyclic motifs in the crystal lattice of **2**.

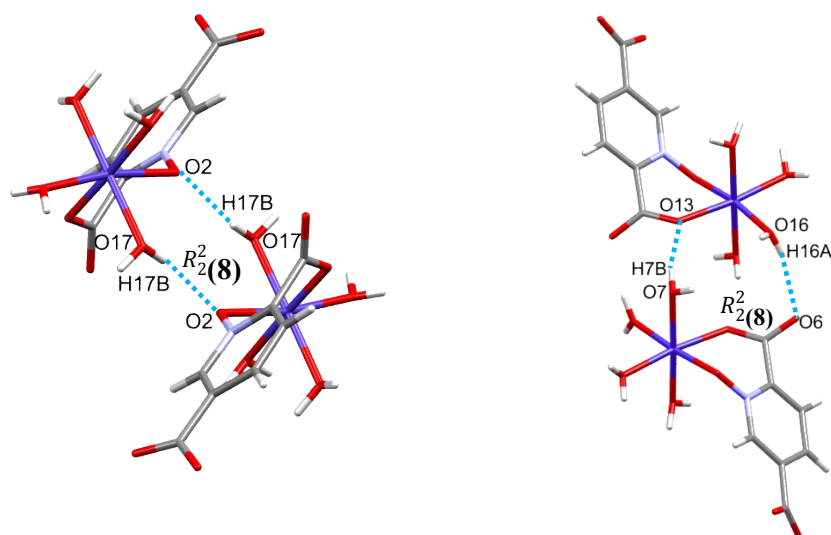

**Fig. S7.** Representation of two model cyclic motifs of  $R_2^2(8)$  created by O–H $\cdots$ O hydrogen bonding along the  $b$  direction in compound **2**.

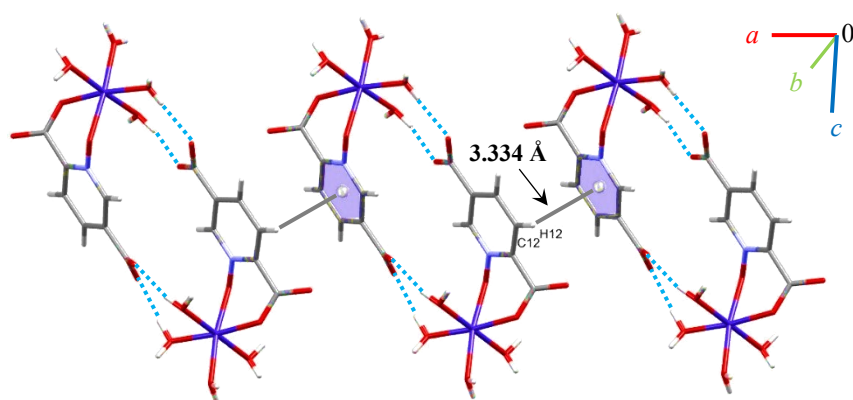

**Fig. S8.** Representation of the one-dimensional linear chain along the  $a$  axis by C–H $\cdots\pi$  interactions in **2**.

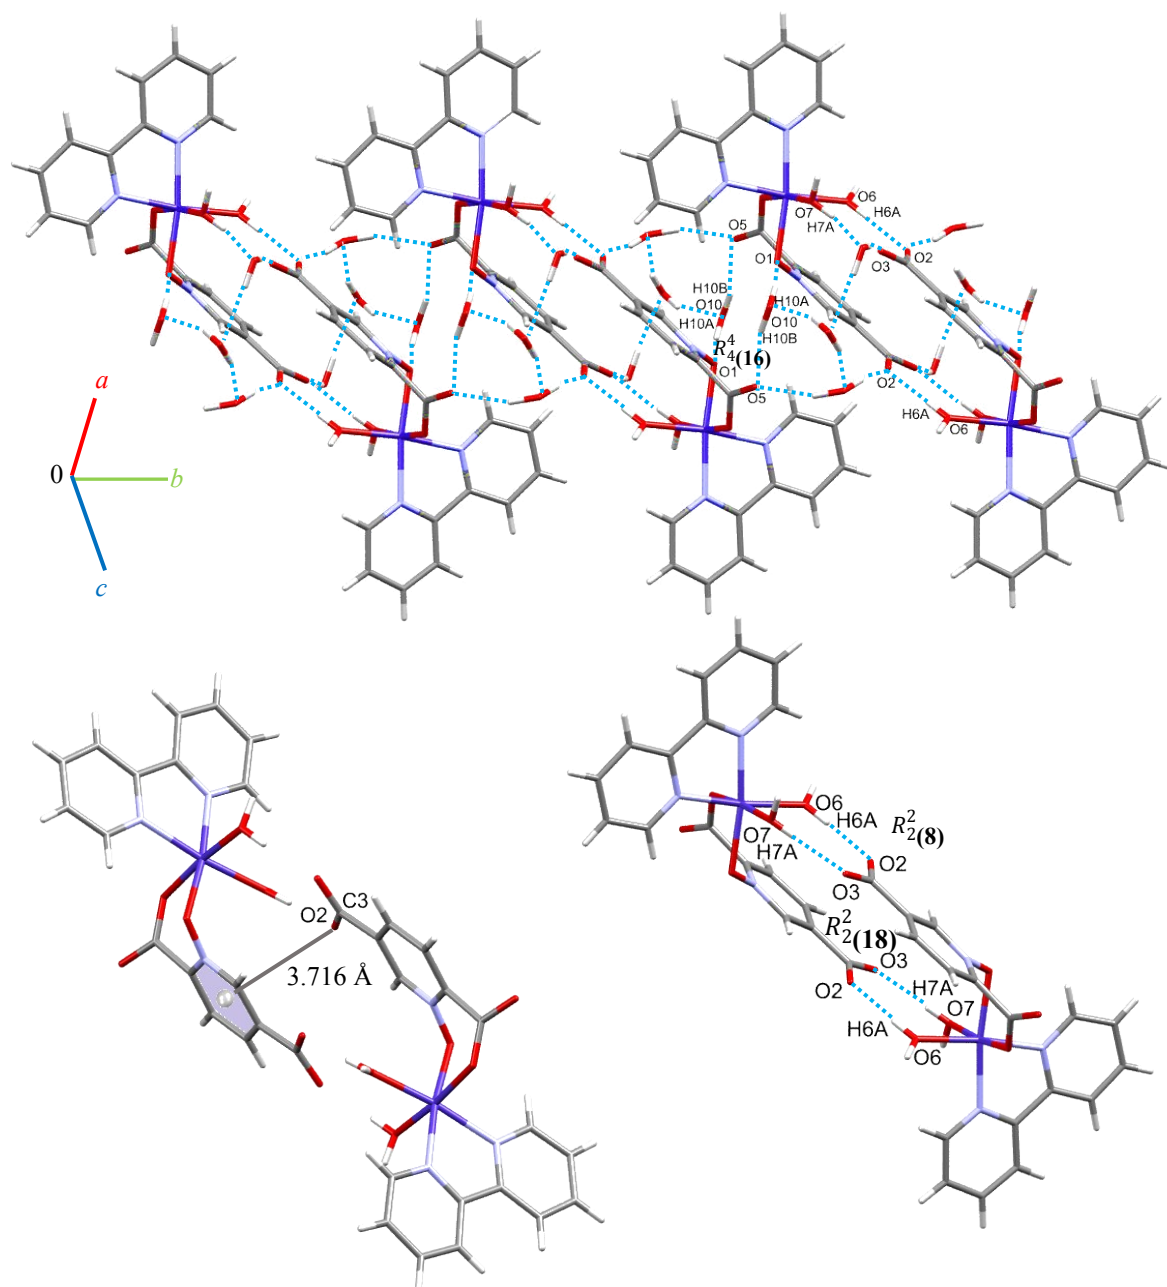

**Fig. S9.** Representation of the linear chain along the *b* axis by hydrogen bonding, C–H... $\pi$  interactions in **5**.

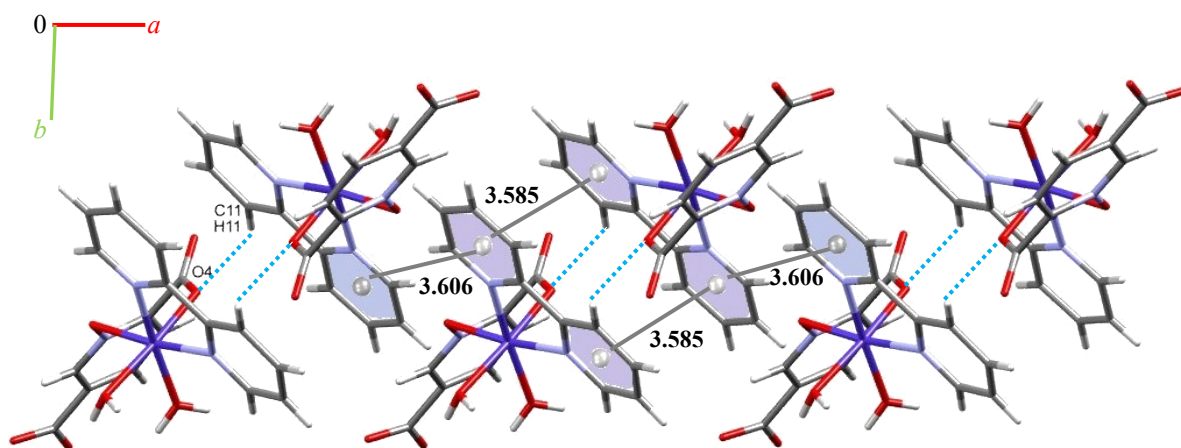

**Fig. S10.** Representation of the chain along the *a* axis formed by  $\pi \cdots \pi$  interactions in **5**, Distances are shown in Å.

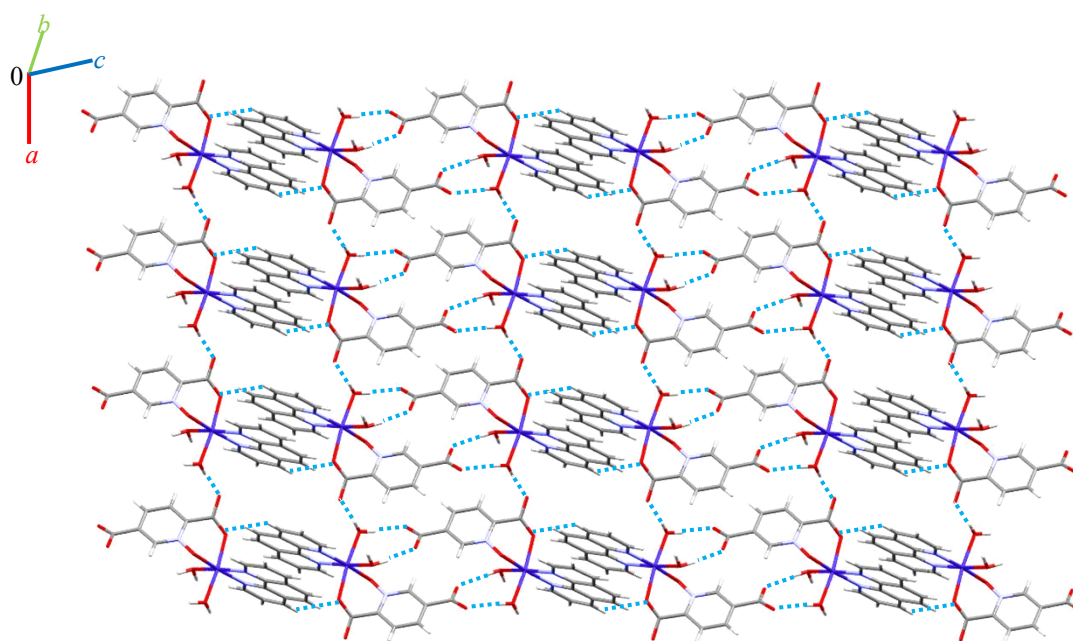

**Fig. S11.** Extended two-dimensional structure in **6**.



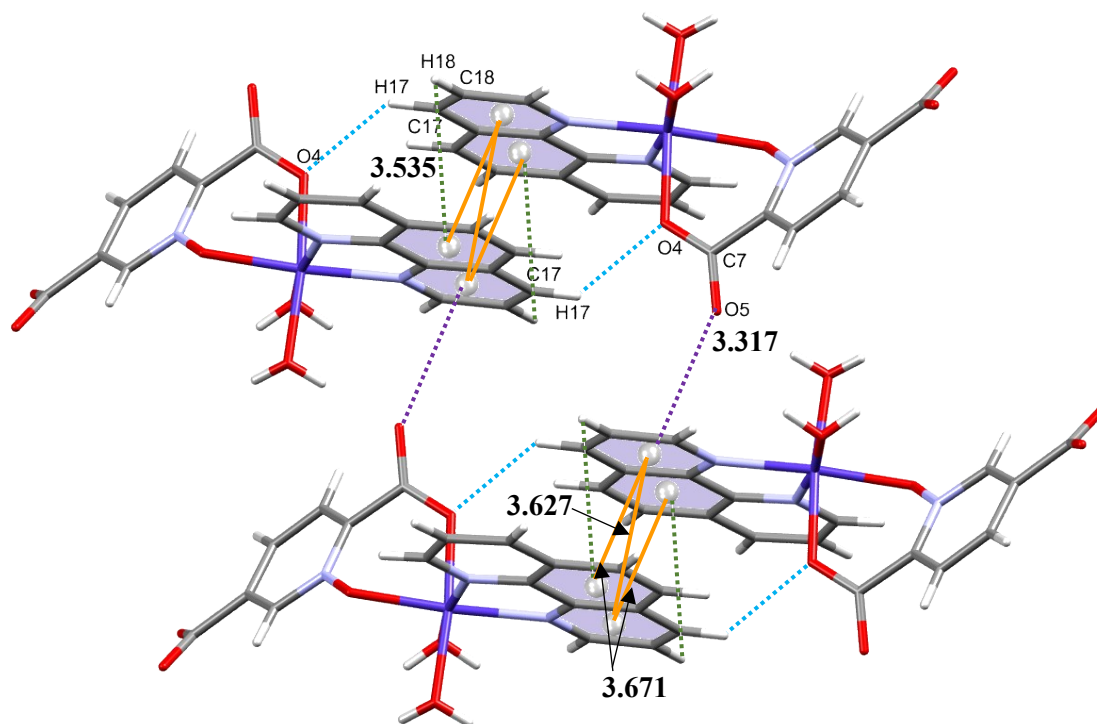

**Fig. 12.** Representation of  $\pi\cdots\pi$ , C-H $\cdots\pi$ , and C-O $\cdots\pi$  interactions in a two-dimensional sheet of **6**, Distances are shown in Å. The hydrogen bonds, C-H $\cdots\pi$ , and C-O $\cdots\pi$  interactions are shown as blue, orange, green, and purple dotted lines, respectively and  $\pi\cdots\pi$  interactions are shown as orange dashed lines.

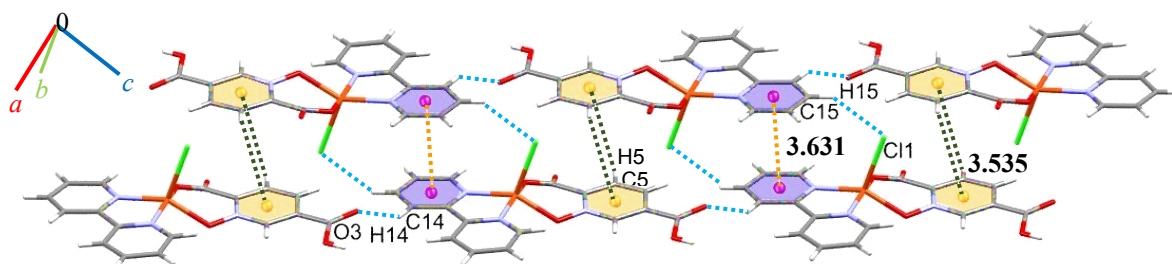

**Fig. S13.** Representation of the chain along side view in **7**, Distances are shown in Å. The hydrogen bonds,  $\pi\cdots\pi$ , and C-H $\cdots\pi$  interactions are shown as blue, orange, and green dotted lines, respectively.

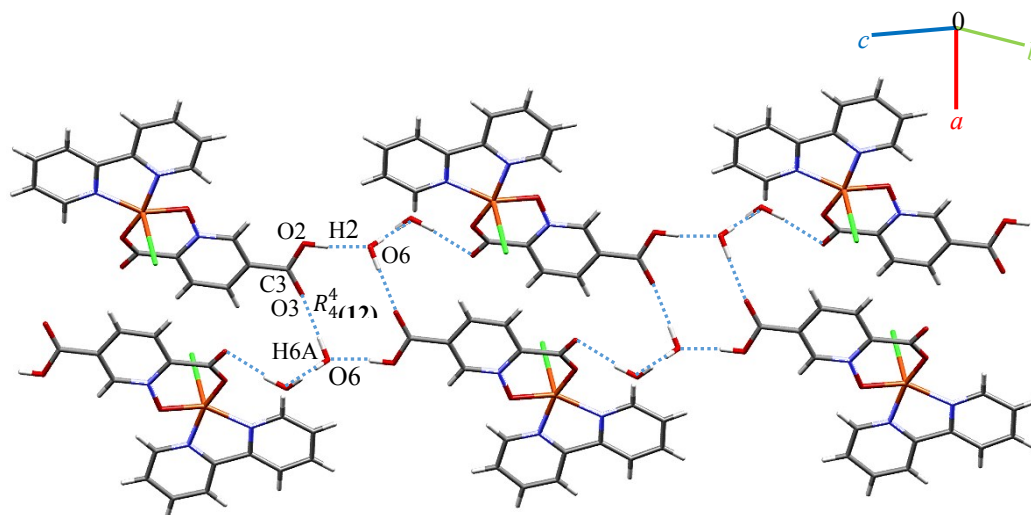

**Fig. S14.** Representation of the chain along side view formed *via* O–H···O hydrogen bonds in 7.

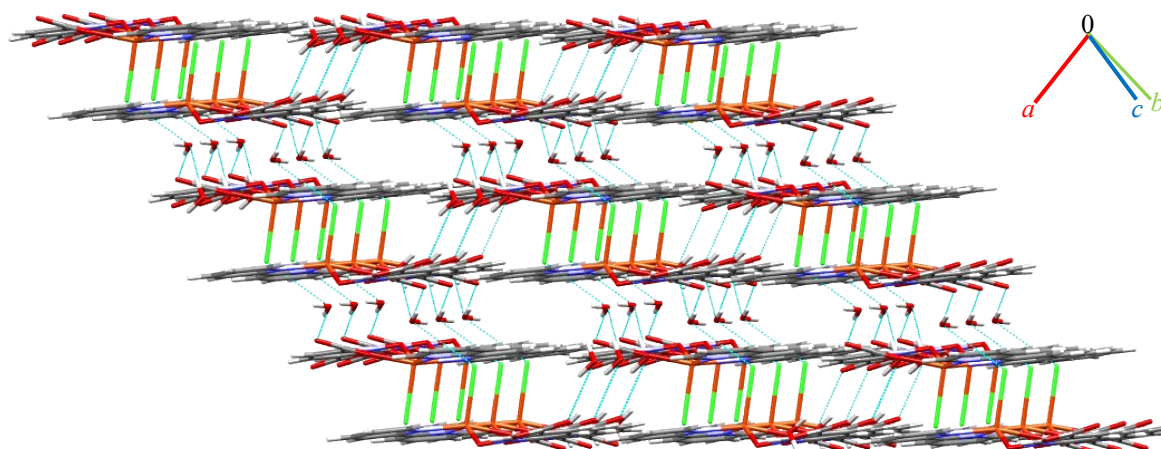

**Fig. S15.** Extended three-dimensional network of compound 7.

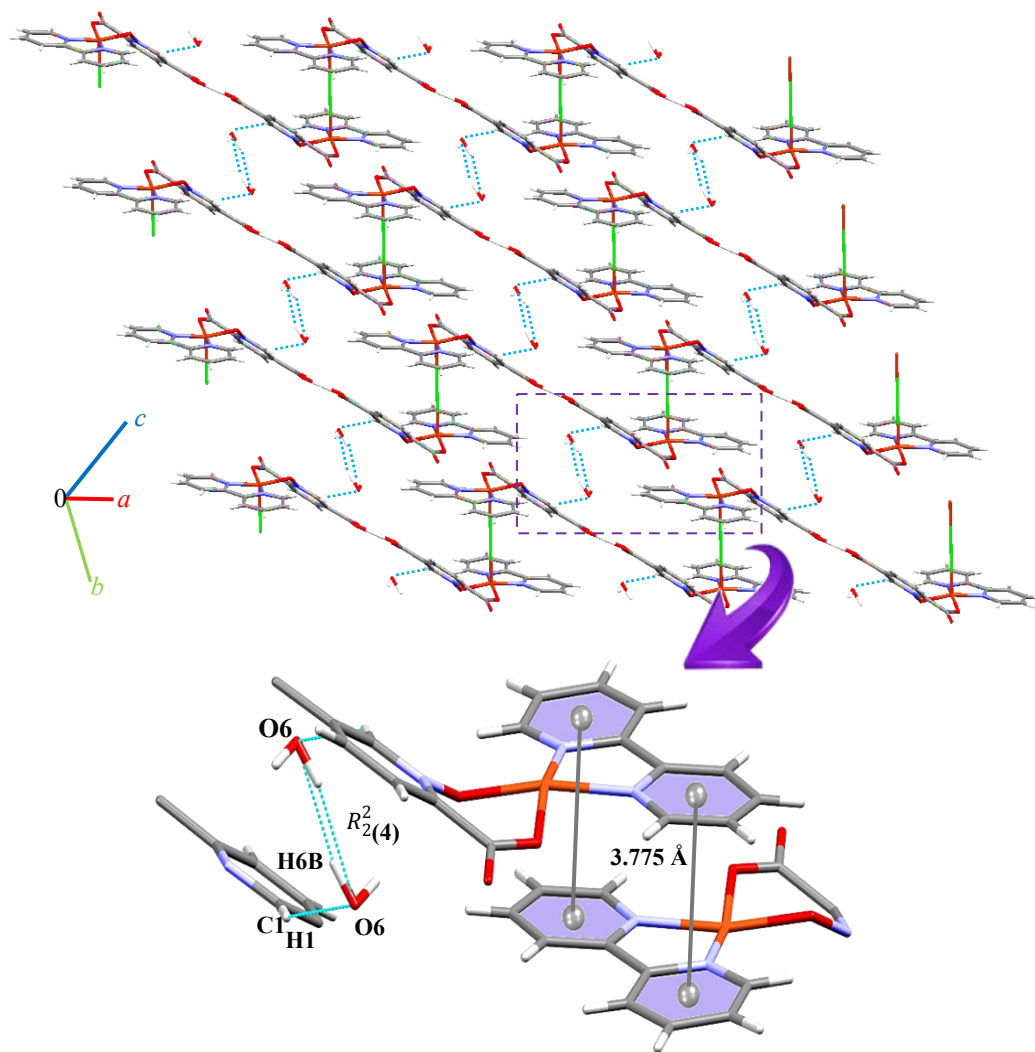

**Fig. S16.** Extended two-dimensional structure of **8** with cyclic  $R_2^2(4)$  motifs formed *via* O–H $\cdots$ O hydrogen bonding and  $\pi\cdots\pi$  interactions. The hydrogen bonds and  $\pi\cdots\pi$  interactions are shown as blue dotted lines and gray dashed lines, respectively.

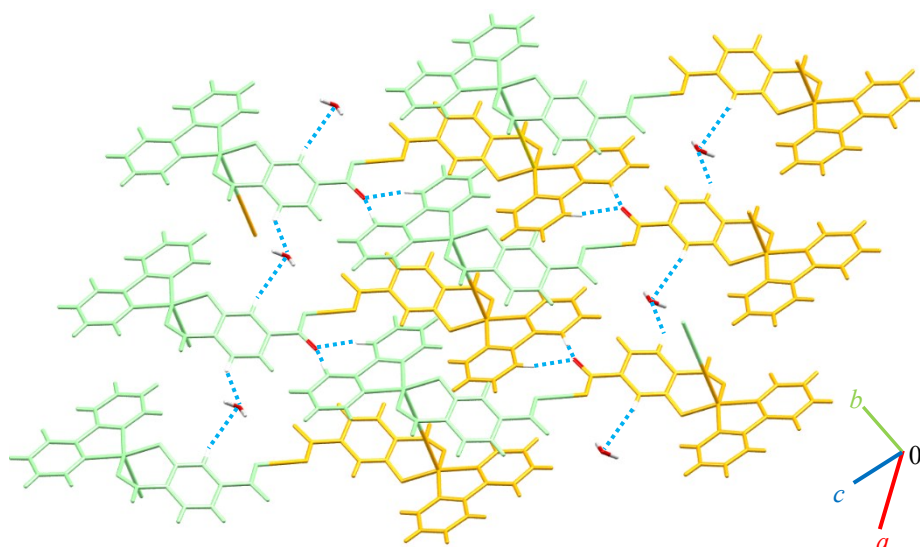

**Fig. S17.** Perspective view of the one dimensional chain of **8** along the *a* axis.

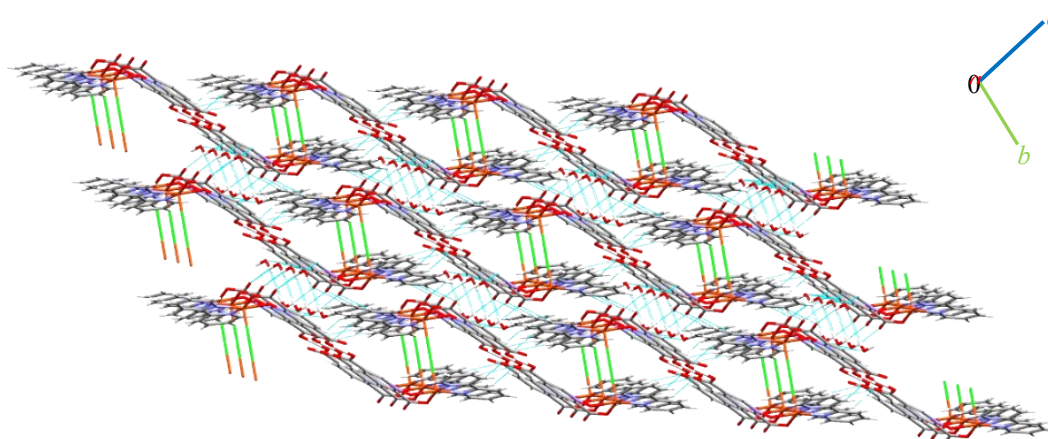

**Fig. S18.** Hydrogen bonding and  $\pi \cdots \pi$  stacking forming the three-dimensional network of **8**.

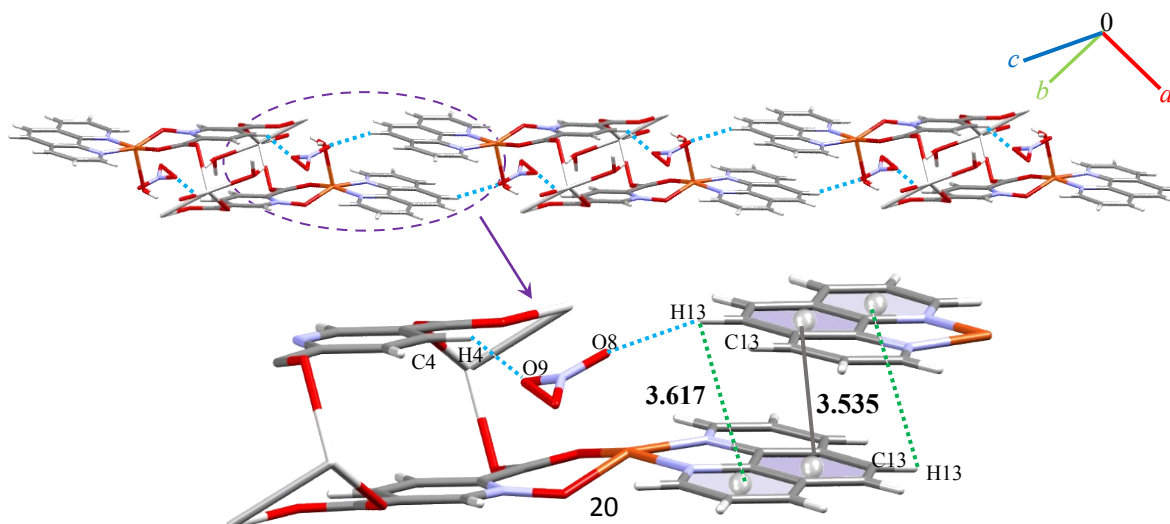

**Fig. S19.** Representation of the one-dimensional chain along side view by hydrogen bonding and  $\pi\cdots\pi$  interactions in **9**. Distances are shown in Å. The hydrogen bonds, C–H $\cdots\pi$  and  $\pi\cdots\pi$  interactions are shown as blue and green dotted lines and gray dashed lines, respectively.

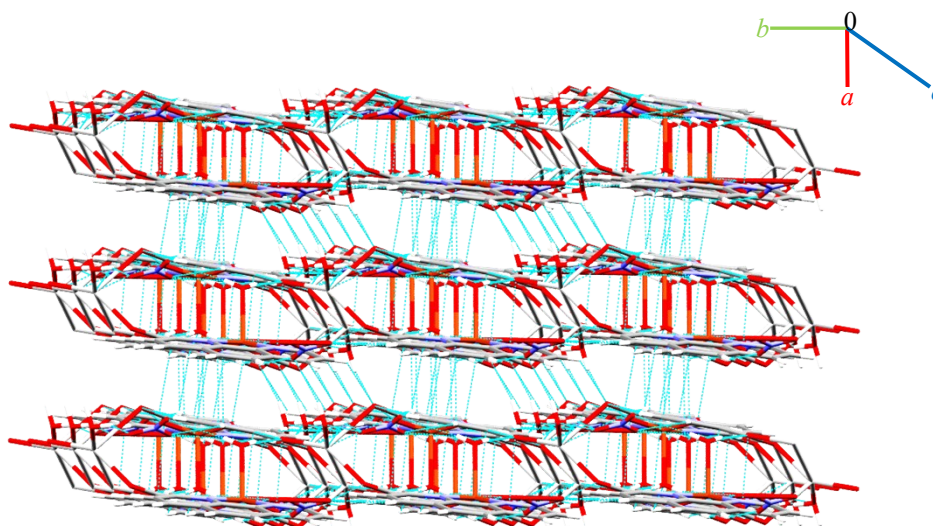

**Fig. S20.** One-dimensional chains link together by hydrogen bonds and weak interactions to form a three-dimensional network of **9**.

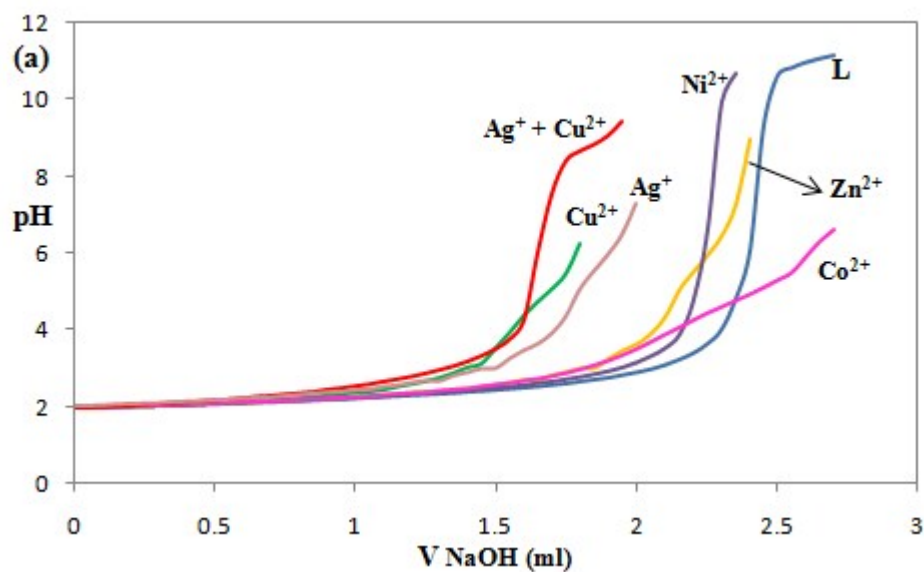

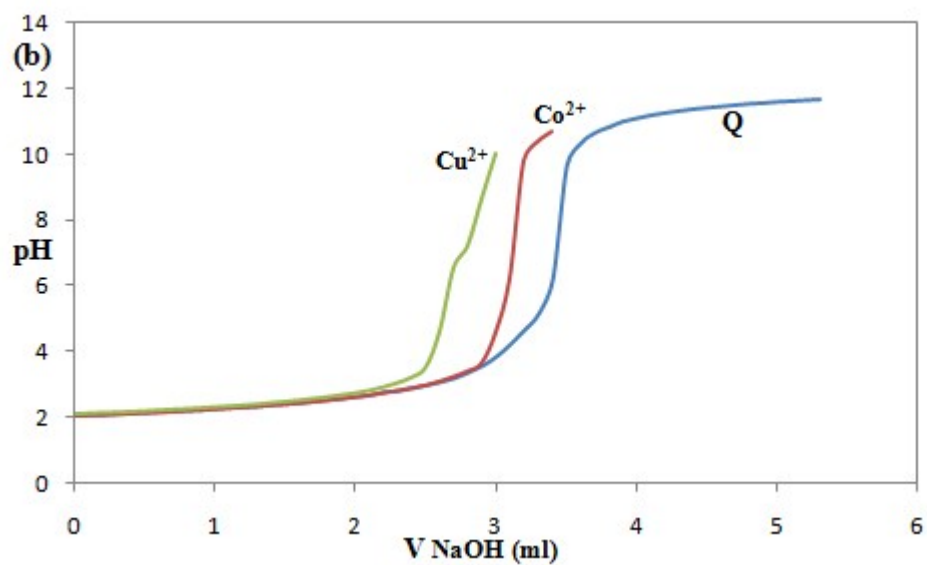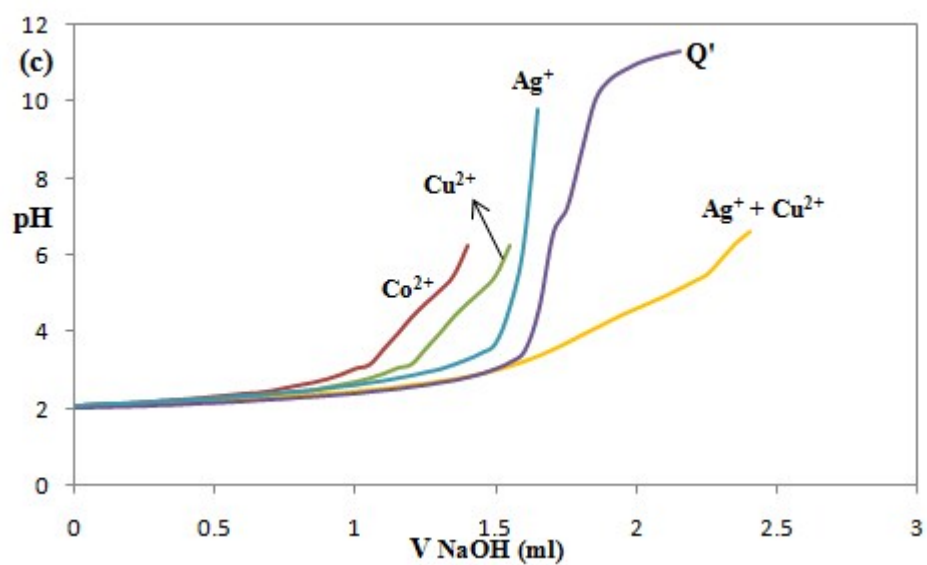

**Fig. S21.** Potentiometric titration curves of 2,5-pydc (a) and 2,2'-bipyridine (b) and 1,10-phenantroline (c) in the presence and absence of  $M^{n+}$  ions with NaOH 0.095 M in aqueous solution at 25 °C  $\mu = 0.1$  M of  $KNO_3$ .
